# Supplementary material for: Comparing super-utilizers and lower-utilizers among commercial- and Medicare-insured adults with sickle cell disease
Source: PubMed Central journal article supplement — Blood Adv. 2023 Nov 24;8(1):224–33. doi: 10.1182/bloodadvances.2023010813 (PMC10805643; doi:10.1182/bloodadvances.2023010813), 2023-11-24
Supplement: BLOODA_ADV-2023-010813-mmc1.pdf [file BLOODA_ADV-2023-010813-mmc1.pdf]

## APPENDIX

Supplementary Table 1. ICD-10 diagnosis codes used to identify SCD genotypes

| SCD Genotype Category | ICD-10 Codes                                                                                                                  |
|-----------------------|-------------------------------------------------------------------------------------------------------------------------------|
| Hb SS                 | D57.00 D57.01 D57.02 D57.03 D57.09                                                                                            |
| Hb SC                 | D57.20 D57.211 D57.212 D57.213 D57.218<br>D57.219                                                                             |
| Hb S $\beta^{+0}$     | D57.40 D57.411 D57.412 D57.419 D57.42<br>D57.431<br>D57.432 D57.438 D57.439 D57.44 D57.451<br>D57.452 D57.453 D57.458 D57.459 |
| Non-specific          | D57.1 D57.80 D57.811 D57.812 D57.813<br>D57.818 D57.819                                                                       |

Hb SS: hemoglobin SS; Hb SC: hemoglobin SC; HB S $\beta^{+0}$ : hemoglobin S $\beta^{+0}$  thalassemia

Supplementary Table 2. ICD-10 diagnosis codes used to identify SCD-related comorbidities

| Comorbidity                    | ICD-10 Codes                                                                                                                                               |
|--------------------------------|------------------------------------------------------------------------------------------------------------------------------------------------------------|
| Cerebrovascular disease (CVD)  | G45, G46, H34.0, I60, I61, I62, I63, I64, I65, I66, I67, I68, I69,                                                                                         |
| Congestive heart failure (CHF) | I09.9, I11.0, I13.0, I13.2, I25.5, I42.0, I42.5, I42.6, I42.7, I42.8, I42.9,<br>I43, I50, P29.0                                                            |
| Pulmonary hypertension (PH)    | I27.0, I27.2                                                                                                                                               |
| Renal disease (RD)             | I12.0, I13.1, N03.2, N03.3, N03.4, N03.5, N03.6, N03.7, N05.2,<br>N05.3, N05.4, N05.5, N05.6, N05.7, N18, N19, N25.0, Z49.0, Z49.1,<br>Z49.2, Z94.0, Z99.2 |

Supplementary Table 3. ICD-10 diagnosis codes used to identify pain episodes

| Variable     | ICD-10 Codes                                                                                                                                                                                                                                                                                                                                                                                                                                                                                                                                                                                                                                            |
|--------------|---------------------------------------------------------------------------------------------------------------------------------------------------------------------------------------------------------------------------------------------------------------------------------------------------------------------------------------------------------------------------------------------------------------------------------------------------------------------------------------------------------------------------------------------------------------------------------------------------------------------------------------------------------|
| Pain episode | D57.0, D57.00, D57.219, D57.419, D57.819, R10.0, R10.10, R10.11, R10.12, R10.13, R10.2, R10.30, R10.31, R10.32, R10.33, R10.84, R10.9, R07.2, R07.89, R07.9, M25.50, M25.511, M25.512, M25.519, M25.521, M25.522, M25.531, M25.532, M25.551, M25.552, M25.559, M25.561, M25.562, M25.569, M25.571, M25.572, M25.579, M79.601, M79.602, M79.603, M79.604, M79.605, M79.606, M79.609, M79.621, M79.622, M79.629, M79.631, M79.632, M79.639, M79.641, M79.642, M79.643, M79.644, M79.645, M79.646, M79.651, M79.652, M79.659, M79.661, M79.662, M79.669, M79.671, M79.672, M79.673, M79.674, M79.675, M79.676, M54.2, M54.5, M54.6, N48.30, N48.32, N48.39 |

Supplementary Table 4. Annual number of pain episodes

| Commercial          |        |           |
|---------------------|--------|-----------|
|                     | Median | Range     |
| Pain Episodes Group |        |           |
| Low                 | 0.25   | 0.00-0.75 |
| Average             | 1.22   | 0.75-2.00 |
| Above Average       | 2.88   | 2.00-4.39 |
| High                | 7.80   | 4.39-41.0 |
| Medicare            |        |           |
|                     | Median | Range     |
| Pain Episodes Group |        |           |
| Low                 | 0.60   | 0.00-1.26 |
| Average             | 2.11   | 1.26-3.24 |
| Above Average       | 4.87   | 3.24-7.48 |
| High                | 12.8   | 7.49-53.0 |

Low Pain Episodes: lowest quartile of annual number of pain episodes; Average Pain Episodes: second quartile of annual number of pain episodes; Above Average Pain Episodes: third quartile of annual number of pain episodes; High Pain Episodes: highest quartile of annual number of pain episodes

Supplementary Table 5. Adjusted rate ratios (95% CI) of annual healthcare encounters and expenditure outcomes between lower-utilizer groups.

| Commercial        |                                 |                                  |                             |
|-------------------|---------------------------------|----------------------------------|-----------------------------|
|                   | Moderate-Util. vs.<br>Low-Util. | High-Util. vs.<br>Moderate-Util. | High-Util. vs.<br>Low-Util. |
| Total Expenditure | 4.38 (4.21-4.56)                | 2.62 (2.76-2.48)                 | 11.48 (10.93-12.05)         |
| Inpatient         |                                 |                                  |                             |
| # Encounters      | 6.66 (5.75-7.71)                | 2.45 (2.69-2.22)                 | 16.30 (14.13-18.79)         |
| Expenditure       | 2.81 (2.64-2.98)                | 2.68 (2.83-2.53)                 | 7.51 (7.04-8.02)            |
| Outpatient        |                                 |                                  |                             |
| # Encounters      | 1.85 (1.78-1.93)                | 1.63 (1.72-1.54)                 | 3.02 (2.88-3.17)            |
| Expenditure       | 2.90 (2.76-3.05)                | 2.33 (2.50-2.18)                 | 6.77 (6.37-7.20)            |
| Emergency Dept.   |                                 |                                  |                             |
| # Encounters      | 2.37 (2.16-2.60)                | 1.63 (1.81-1.47)                 | 3.88 (3.50-4.29)            |
| Expenditure       | 2.01 (1.85-2.19)                | 1.70 (1.88-1.54)                 | 3.43 (3.11-3.77)            |
| Medicare          |                                 |                                  |                             |
|                   | Moderate-Util. vs.<br>Low-Util. | High-Util. vs.<br>Moderate-Util. | High-Util. vs.<br>Low-Util. |
| Total Expenditure | 3.80 (3.67-3.94)                | 1.89 (1.98-1.81)                 | 7.20 (6.89-7.52)            |
| Inpatient         |                                 |                                  |                             |
| # Encounters      | 3.31 (3.16-3.48)                | 1.69 (1.76-1.62)                 | 5.59 (5.32-5.88)            |
| Expenditure       | 3.30 (3.19-3.43)                | 1.88 (1.96-1.79)                 | 6.20 (5.93-6.48)            |
| Outpatient        |                                 |                                  |                             |
| # Encounters      | 1.72 (1.64-1.80)                | 1.32 (1.40-1.25)                 | 2.27 (2.15-2.40)            |
| Expenditure       | 4.07 (3.81-4.35)                | 2.06 (2.24-1.89)                 | 8.39 (7.73-9.11)            |
| Emergency Dept.   |                                 |                                  |                             |
| # Encounters      | 2.12 (1.98-2.26)                | 1.88 (2.03-1.74)                 | 3.97 (3.68-4.29)            |
| Expenditure       | 2.20 (2.07-2.34)                | 1.90 (2.05-1.76)                 | 4.18 (3.89-4.50)            |

Low-Util.: bottom 50% of costs; Moderate Util.: top 25-49.9% of costs; High-Util: top 10-24.9% of costs

Supplementary Table 6. Adjusted rate ratios (95% CI) of annual healthcare encounters and expenditure outcomes between utilizer groups among Medicare-insured, by dual eligibility status

|                   | Dual Eligible <sup>a</sup>     |                                   |                              |
|-------------------|--------------------------------|-----------------------------------|------------------------------|
|                   | Super-Util. vs.<br>Low-Util.   | Super-Util. vs.<br>Moderate-Util. | Super-Util. vs.<br>High-Util |
| Total Expenditure | 13.09 (12.38-13.84)            | 6.94 (6.62-7.28)                  | 3.61 (3.48-3.75)             |
| Inpatient         |                                |                                   |                              |
| # Encounters      | 9.34 (8.78-9.94)               | 5.80 (5.47-6.16)                  | 3.28 (3.09-3.47)             |
| Expenditure       | 12.39 (11.70-13.13)            | 6.13 (5.83-6.44)                  | 3.18 (3.05-3.31)             |
| Outpatient        |                                |                                   |                              |
| # Encounters      | 2.74 (2.53-2.97)               | 2.27 (2.12-2.43)                  | 1.71 (1.62-1.81)             |
| Expenditure       | 11.07 (9.83-12.47)             | 7.61 (6.88-8.42)                  | 3.89 (3.59-4.22)             |
| Emergency Dept.   |                                |                                   |                              |
| # Encounters      | 7.71 (6.93-8.56)               | 3.99 (3.65-4.37)                  | 2.08 (1.93-2.25)             |
| Expenditure       | 8.99 (8.11-9.96)               | 4.32 (3.96-4.71)                  | 2.18 (2.02-2.34)             |
|                   | Not Dual Eligible <sup>b</sup> |                                   |                              |
|                   | Super-Util. vs.<br>Low-Util.   | Super-Util. vs.<br>Moderate-Util. | Super-Util. vs.<br>High-Util |
| Total Expenditure | 13.91 (12.39-15.61)            | 7.66 (6.99-8.38)                  | 4.07 (3.79-4.38)             |
| Inpatient         |                                |                                   |                              |
| # Encounters      | 7.53 (6.81-8.32)               | 4.94 (4.51-5.42)                  | 3.30 (3.03-3.59)             |
| Expenditure       | 13.25 (11.83-14.85)            | 6.23 (5.69-6.82)                  | 3.51 (3.26-3.77)             |
| Outpatient        |                                |                                   |                              |
| # Encounters      | 2.70 (2.39-3.05)               | 2.22 (2.02-2.45)                  | 1.67 (1.55-1.81)             |
| Expenditure       | 15.38 (12.82-18.46)            | 10.03 (8.68-11.59)                | 4.24 (3.78-4.76)             |
| Emergency Dept.   |                                |                                   |                              |
| # Encounters      | 4.70 (3.94-5.61)               | 3.62 (3.15-4.17)                  | 2.07 (1.84-2.32)             |
| Expenditure       | 5.86 (4.92-6.97)               | 3.71 (3.24-4.26)                  | 2.19 (1.97-2.45)             |

Low-Util.: bottom 50% of costs; Moderate-Util.: top 25-49.9% of costs; High-Util: top 10-24.9% of costs; Super-Util: top 10% of costs

<sup>a</sup>Dual eligible for Medicare and Medicaid at any point and for any duration during the study time range

<sup>b</sup>Never dual eligible for Medicare and Medicaid at any point in the study time range

Supplementary Table 7. Adjusted rate ratios (95% CI) of annual healthcare encounters and expenditure outcomes between pain episode encounters groups among super-utilizers.

| Commercial        |                                              |                                                  |
|-------------------|----------------------------------------------|--------------------------------------------------|
|                   | Avg. Pain Episodes vs.<br>High Pain Episodes | Ab. Avg. Pain Episodes vs.<br>High Pain Episodes |
| Total Expenditure | 0.87 (0.73-1.04)                             | 0.94 (0.82-1.08)                                 |
| Inpatient         |                                              |                                                  |
| # Encounters      | 0.23 (0.17-0.31)                             | 0.42 (0.36-0.50)                                 |
| Expenditure       | 0.66 (0.55-0.80)                             | 0.84 (0.73-0.97)                                 |
| Outpatient        |                                              |                                                  |
| # Encounters      | 1.12 (0.96-1.32)                             | 0.98 (0.86-1.11)                                 |
| Expenditure       | 1.58 (1.27-1.97)                             | 1.22 (1.03-1.46)                                 |
| Emergency Dept.   |                                              |                                                  |
| # Encounters      | 0.10 (0.07-0.16)                             | 0.21 (0.16-0.28)                                 |
| Expenditure       | 0.17 (0.12-0.24)                             | 0.27 (0.21-0.34)                                 |
| Medicare          |                                              |                                                  |
|                   | Avg. Pain Episodes vs.<br>High Pain Episodes | Ab. Avg. Pain Episodes vs.<br>High Pain Episodes |
| Total Expenditure | 0.91 (0.79-1.04)                             | 0.92 (0.82-1.03)                                 |
| Inpatient         |                                              |                                                  |
| # Encounters      | 0.58 (0.53-0.63)                             | 0.65 (0.60-0.70)                                 |
| Expenditure       | 0.90 (0.79-1.03)                             | 0.94 (0.84-1.05)                                 |
| Outpatient        |                                              |                                                  |
| # Encounters      | 1.00 (0.85-1.18)                             | 0.89 (0.78-1.03)                                 |
| Expenditure       | 1.56 (1.22-2.00)                             | 1.32 (1.06-1.63)                                 |
| Emergency Dept.   |                                              |                                                  |
| # Encounters      | 0.16 (0.13-0.20)                             | 0.27 (0.23-0.32)                                 |
| Expenditure       | 0.20 (0.16-0.25)                             | 0.26 (0.22-0.31)                                 |

Avg. Pain Episodes: second quartile of annual number of pain episode encounters; Ab. Avg. Pain Episodes: third quartile of annual number of pain episode encounters; High Pain Episodes: highest quartile of annual number of pain episode encounters
